# Supplementary material for: The Time-Resolved Salt Stress Response of Dunaliella tertiolecta—A Comprehensive System Biology Perspective
Source: Int J Mol Sci. 2023 Oct 19;24(20):15374. doi: 10.3390/ijms242015374 (PMC10607294; doi:10.3390/ijms242015374)
Supplement: Supplementary file 1 [file ijms-24-15374-s001.zip › Nucleotide sequence.xlsx]

## Sheet: Nucleotide sequence
Protein	Name	nucleotide sequence
26S proteasome non-ATPase regulatory subunit 4 (PSMD4),	dtdenovo19235/dtcontr9492/dt2M0h9489/dt2m30m9570/dt2M4h9519	atgtctgagtgcaccgctgtcttgatggacaattcggagagcacgcggagcggggactacgtgcctacgcggttctccgctcaaaccgatgccgtgaacctgctggctggagccaagacccaggcgcaccctgagaacaccgtgggcgtgctgaccatggccggcaagacgccccaggtcctggtcacgcccacgcaggacctggggcgggtgttgaactgcatgactgagattgatgtggagggctcctccaacttctctgctgccgtgcaaatagcccagctggccctcaagcaccgccagaacaaaaaccagagacagcgtgtggtcatctttgtggctagccccatcaaggaggatagagaaacccttgtcaagattgccaagaagctgaagaag…
7,8-dihydroneopterin aldolase/epimerase/oxygenase	dtdenovo6560	atgggaagggtacccgtgtccacttgcgaagatgcacaccatcaccaaggctttcgggagcctggtgcgagtgagcattgccctggagtcgctcagttatctaaacagcagcagttgggaaggtggtggacgtcctcccttgcggcccacccaattaaggctcacccagttgccttgcggccttattcgtcttccagcctaggatctagtagggatcaaggggcacgtgacacaattcatatcacaggtgcacgcttctacggatatcatggggtgcttcctgaggagaatgttgttgggcagccatttgtggtggaccttctgctgcactgtgacctgggggaagccggttcttcggatgacctgcaggcaacggttagctatgcagaggtgttcaat…
7,8-dihydroneopterin aldolase/epimerase/oxygenase	mRNADt15622	gatttcaaagtcaatttccaaacgtttagcaccaactatttcgttgttgttgccatgtccgttgtacaaaggacggggcggtgcctcccgaaccttatccccttgcttcctcaaagcactgcgttgaccagctgtttgtactcagctaaccacaatgcaagcacatgcaacccagtcaaagactcatgccaagatgacatgggaagggtacccgtgtccacttgcgaagatgcacaccatcaccaaggctttcgggagcctggtgcgagtgagcattgccctggagtcgctcagttatctaaacagcagcagttgggaaggtggtggacgtcctcccttgcggcccacccaattaaggctcacccagttgccttgcggccttattcgtcttccagccta…
ABC transporter	mRNADt2587	atggccagcgtcgagcaagtcactggtcttttcgagaagctctccactgggagcagcgctgccgagcgcgccccccatgccagcgaggtggccaacatggtcaagtccaagggtgcctccaccattgagtcagctggcatcgctgccaagctgcaggaggccctgaacgacgcagccaaccccaccgcccgcgagggtgccctggaggccttcactgccctggtcaaggctgtgggccccactgcagagccctttgtgatgggcctgctgcccgccgtgttggaccgtctgagcgacaaggtggctcccgtgcgcaccgctgccgaggctgcagtgcctgccttcattgacatcgtgaacccctactccgtggaggatgtgctggtgcacctgtttgac…
activator of Hsp90 ATPase	dtdenovo15652/dtcontr7694/dt2M0h7700/dt2m30m7756/dt2M4h7725/mRNADt27470	atggcaaagctggaggagaaggatcccaggtggatcgtggaagaaaggaaagatggcacaaacgtgggtggctggcactgggtggagaaagatatgatgccctggagcagggaacggctgcagcaactgttctcaggcatgcagctcatcaacgaccctgccaaagcccagacactcaccatcacggggttagaggatctcaagggagaggcgctggtgaacaatcggaagaacaagatcatccccagctacgagctggagattcggttgaactgggcaggcagcgtggctggtgaggaggccaagggcaaggtcgtgctgccatacgtatctgacgagaactcggatgaggagcctgaggtcaaggttgctttggaagcagagaccaaggcagccaag…
Adaptin C-terminal domain	dsdenovo3402	atgaaaatctttgggtcgatgcggctcagggacctcatccgtgcggttagggcgtgcaagaccgcagcggaggagcgggaggtgattgccaaggagtcagcagctctgagggaggacttcaggagcgaggatggccagttctacaggcacaggaacgtggccaagctcatgtacatccacatgctgggttatcccacccactttgggcagatggagaccctgaagctgattgcgggcgcaggctttgccgagaagcgcatcggctacctgggcctgatgatcttgctggacgagcggcaggaggtgctcatgctggtcaccaactccatcaagctggacctcaaccacatcaacccctacattgtggggctggccttggctgccctgggcaacatctgc…
Adaptin C-terminal domain	dtdenovo6390	atgcggctcagggacctcatccgtgcggttagggcgtgcaagaccgcagcggaggagcgggaggtgattgccaaggagtcagcagctctgagggaggacttcaggagcgaggatggccagttctacaggcacaggaacgtggccaagctcatgtacatccacatgctgggttatcccacccactttgggcagatggagaccctgaagctgattgcgggcgcaggctttgccgagaagcgcatcggctacctgggcctgatgatcttgctggacgagcggcaggaggtgctcatgctggtcaccaactccatcaagctggacctcaaccacatcaacccctacattgtggggctggccttggctgccctgggcaacatctgctctgctgaaatggcacgc…
Adaptin C-terminal domain	dtdenovo6388/dtcontr3154/dt2M0h3176/dt2m30m3183/dt2M4h3185	atgaaaatctttgggtcgatgcggctcagggacctcatccgtgcggttagggcgtgcaagaccgcagcggaggagcgggaggtgattgccaaggagtcagcagctctgagggaggacttcaggagcgaggatggccagttctacaggcacaggaacgtggccaagctcatgtacatccacatgctgggttatcccacccactttgggcagatggagaccctgaagctgattgcgggcgcaggctttgccgagaagcgcatcggctacctgggcctgatgatcttgctggacgagcggcaggaggtgctcatgctggtcaccaactccatcaagctggacctcaaccacatcaacccctacattgtggggctggccttggctgccctgggcaacatctgc…
Adaptin C-terminal domain	mRNADt18195	atgaaaatctttgggtcgatgcggctcagggacctcatccgtgcggttagggcgtgcaagaccgcagcggaggagcgggaggtgattgccaaggagtcagcagctctgagggaggacttcaggagcgaggatggccagttctacaggcacaggaacgtggccaagctcatgtacatccacatgctgggttatcccacccactttgggcagatggagaccctgaagctgattgcgggcgcaggctttgccgagaagcgcatcggctacctgggcctgatgatcttgctggacgagcggcaggaggtgctcatgctggtcaccaactccatcaagctggacctcaaccacatcaacccctacattgtggggctggccttggctgccctgggcaacatctgc…
Adaptin C-terminal domain	dtdenovo6389	atgaaaatctttgggtcgatgcggctcagggacctcatccgtgcggttagggcgtgcaagaccgcagcggaggagcgggaggtgattgccaaggagtcagcagctctgagggaggacttcaggagcgaggatggccagttctacaggcacaggaacgtggccaagctcatgtacatccacatgctgggttatcccacccactttgggcagatggagaccctgaagctgattgcgggcgcaggctttgccgagaagcgcatcggctacctgggcctgatgatcttgctggacgagcggcaggaggtgctcatgctggtcaccaactccatcaagctggacctcaaccacatcaacccctacattgtggggctggccttggctgccctgggcaacatctgc…
ADP-ribosylation Crystallin J1. Source PGD	dtdenovo12020/mRNADt16563	atgaacccacaggaaaatatttgtgcaagacttgccggtcgcatttcgtcatcatcatccgagttgcaagcagcgcggggatgcttggtgggggggatggtcggggatgctgcgggcgctgttctggagttcaggcgttattacgatgaggatcatgtccgggtggccatgactatgccaggaggcgggctccttgcagttggcccgggtcagatcacagatgactcagaattgatgctggctcttttgcatggtcttcggggcagtcacccatcagccttcccggccgaggctgttgcccaacgctacatcgattggctccaatcaagaccttttgacatgggcaacaccacccgacttgccttctctgctcgcagcccctcagaggtgcccgtgctc…
AIG1 family	mRNADt876	gaagaggaagaggaggaggaggaccaagatgtggccacgccatggacgggcttagcaaaactcccggagcggtctgacgtgcttggatgcttgcgtgagctgaaggacgtcgggttcaagcagctaaatgtgctgttactaggcaagtccagtgtgggcaagagcagcaccgtgaatagcttgttaggggagactgtggcgcgcgtacaagccttcaagctgcaggcggatgccgagatcatttcaccctttgtgaaagaggtgcaagaaagctcagggcccgaggctgcaggcatgcggattaagctgatagacactgtgggcctggaggacgcagaatccggagacgctgtgaacctgcaggcgttgcggaagatcgcggacagcatcaagggccag…
all molecular heat shock protein 10	dtdenovo5223/dtcontr2560/dt2M0h2576/dt2m30m2576/dt2M4h2596/dsdenovo2784/mRNADt21287	atggcccaacgcctcaagcctctcctggacaaggttcttgtgcagaaggtcatgcccatgaccaagtctgctgcggggatcctgatgcctgagactgcggcaccacgggtaaatgaggggattgtgctggccactggcccaggcaggcgcacgcttgatggctccctggtgcctgtgagcgttaaggaaggggacaaagtgctcctcccggagtttggcggcatcaccgtgaagctagacgaggacaagaccaaagagacttcttatcacctgtaccgtgacgatgagatcctgggtattttgcaagacaagtaa
all molecular heat shock protein 11	mRNADt21288	accaccatggcccaacgcctcaagcctctcctggacaaggttcttgtgcagaaggtcatgcccatgaccaagtctgctgcggggatcctgatgcctgagactgcggcaccacgggtaaatgaggggattgtgctggccactggcccaggcaggcgcacgcttgatggctccctggtgcctgtgagcgttaaggaaggggacaaagtgctcctcccggagtttggcggcatcaccgtgaagctagacgaggacaagaccaaagagacttcttatcacctgtaccgtgacgatgagatcctgggtattttgcaagacaagtaa
Belongs to the actin family	mRNADt2511	atgaccgacgcggagtcctcgtgtgtggtgtgcgacaatgggtcggggatggtcaaggctgggtttagcggagaggatgccccacgctcagtgttcagctccatcattggcaagccacgccatcaaatggctatgctgggcatgggccaaaaggagtactacgttggtgatgaggctcagtccaagcgtggtatcttgtctctgagctacccaatagcccatggaattgtgaccaactgggaggagatggaggctatctggcgccatacgtttgacaatgagctgcgagtggacatcagcacacggccagtaatgcttacagaggcccccatgaaccccaagatcaacagggagcgcatgacaaccctcatgtttgaggactttaacgtgcccgccatg…
Belongs to the DEAD box helicase family	dtdenovo11230	atgaagaggcagcgcaaggagccagagagagacttagcagccggaaagggcaagcatgcaaagcctcccactcagaagaagaagaaagcaagcaaagaggactattgggatgggcttgaagggtggaagcctgtagatgttggagaggacttcttgctgggtgctgaggagggaggctttgctggccttgaagttttggaggacacctccatcattgacccctccatgctggaagatggccaagccaacagaggggaggctgcactcgcagaggatggtcctgggggtgggagtgacgcaggcaacggggggaaggcatctcaggcagaggggcctgaggccctgcgcgcgcggatagctgccctggaagcagagcttaaaaaggacaagaaacagctg…
Belongs to the DEAD box helicase family	dtdenovo11231	atgaagaggcagcgcaaggagccagagagagacttagcagccggaaagggcaagcatgcaaagcctcccactcagaagaagaagaaagcaagcaaagaggactattgggatgggcttgaagggtggaagcctgtagatgttggagaggacttcttgctgggtgctgaggagggaggctttgctggccttgaagttttggaggacacctccatcattgacccctccatgctggaagatggccaagccaacagaggggaggctgcactcgcagaggatggtcctgggggtgggagtgacgcaggcaacggggggaaggcatctcaggcagaggggcctgaggccctgcgcgcgcggatagctgccctggaagcagagcttaaaaaggacaagaaacagctg…
Belongs to the DEAD box helicase family	dt2m30m5627	atgaagaggcagcgcaaggagccagagagagacttagcagccggaaagggcaagcatgcaaagcctcccactcagaagaagaagaaagcaagcaaagaggactattgggatgggcttgaagggtggaagcctgtagatgttggagaggacttcttgctgggtgctgaggagggaggctttgctggccttgaagttttggaggacacctccatcattgacccctccatgctggaagatggccaagccaacagaggggaggctgcactcgcagaggatggtcctgggggtgggagtgacgcaggcaacggggggaaggcatctcaggcagaggggcctgaggccctgcgcgcgcggatagctgccctggaagcagagcttaaaaaggacaagaaacagctg…
Belongs to the DEAD box helicase family	dsdenovo6121	atgaaccttacattcaggcagcgcaaggagccagagagagacttagcagccggaaagggcaagcatgcaaagcctcccactcagaagaagaagaaagcaagcaaagaggactattgggatgggcttgaagggtggaagcctgtagatgttggagaggacttcttgctgggtgctgaggagggaggctttgctggccttgaagttttggaggacacctccatcattgacccctccatgctggaagatggccaagccaacagaggggaggctgcactcgcagaggatggtcctgggggtgggagtgacgcaggcaacggggggaaggcatctcaggcagaggggcctgaggccctgcgcgcgcggatagctgccctggaagcagagcttaaaaaggacaag…
Belongs to the DEAD box helicase family	dtdenovo11232	atgaagaggcagcgcaaggagccagagagagacttagcagccggaaagggcaagcatgcaaagcctcccactcagaagaagaagaaagcaagcaaagaggactattgggatgggcttgaagggtggaagcctgtagatgttggagaggacttcttgctgggtgctgaggagggaggctttgctggccttgaagttttggaggacacctccatcattgacccctccatgctggaagatggccaagccaacagaggggaggctgcactcgcagaggatggtcctgggggtgggagtgacgcaggcaacggggggaaggcatctcaggcagaggggcctgaggccctgcgcgcgcggatagctgccctggaagcagagcttaaaaaggacaagaaacagctg…
Belongs to the DEAD box helicase family	dtcontr5575	atgaagaggcagcgcaaggagccagagagagacttagcagccggaaagggcaagcatgcaaagcctcccactcagaagaagaagaaagcaagcaaagaggactattgggatgggcttgaagggtggaagcctgtagatgttggagaggacttcttgctgggtgctgaggagggaggctttgctggccttgaagttttggaggacacctccatcattgacccctccatgctggaagatggccaagccaacagaggggaggctgcactcgcagaggatggtcctgggggtgggagtgacgcaggcaacggggggaaggcatctcaggcagaggggcctgaggccctgcgcgcgcggatagctgccctggaagcagagcttaaaaaggacaagaaacagctg…
Belongs to the DEAD box helicase family	dt2M0h5605	atgaagaggcagcgcaaggagccagagagagacttagcagccggaaagggcaagcatgcaaagcctcccactcagaagaagaagaaagcaagcaaagaggactattgggatgggcttgaagggtggaagcctgtagatgttggagaggacttcttgctgggtgctgaggagggaggctttgctggccttgaagttttggaggacacctccatcattgacccctccatgctggaagatggccaagccaacagaggggaggctgcactcgcagaggatggtcctgggggtgggagtgacgcaggcaacggggggaaggcatctcaggcagaggggcctgaggccctgcgcgcgcggatagctgccctggaagcagagcttaaaaaggacaagaaacagctg…
Belongs to the DEAD box helicase family	dt2M4h5609	atgaagaggcagcgcaaggagccagagagagacttagcagccggaaagggcaagcatgcaaagcctcccactcagaagaagaagaaagcaagcaaagaggactattgggatgggcttgaagggtggaagcctgtagatgttggagaggacttcttgctgggtgctgaggagggaggctttgctggccttgaagttttggaggacacctccatcattgacccctccatgctggaagatggccaagccaacagaggggaggctgcactcgcagaggatggtcctgggggtgggagtgacgcaggcaacggggggaaggcatctcaggcagaggggcctgaggccctgcgcgcgcggatagctgccctggaagcagagcttaaaaaggacaagaaacagctg…
biotin synthase	dsdenovo953	atgattcctgtcgtgggccgtcgtctgctccatcaactggcagcagccgaggcaactacattgctgcccgtgaccgccagcagggcgtacaccacgccctcggtgcagcagcaggcagaggcagccacgcaggcagtcgcggcggccccgcggatcgtgctccagcagcaaggggaagagggggtgagctctagcagcagtacaactccaacaacatccaacagcagaccacgatggctggagcagctgggggtcatccgcacggactggacgcgggaggagattgcagaggtgtaccacacacctatcctggaccttgtatataatgcagcaacagtacaccgcatgtacaatgacccccaaatggtccagcgatgtacgctgctgagcatcaagaca…
biotin synthase	dtdenovo1817	atgattcctgtcgtgggccgtcgtctgctccatcaactggcagcagccgaggcaactacattgctgcccgtgaccgccagcagggcgtacaccacgccctcggtgcagcagcaggcagaggcagccacgcaggcagtcgcggcggccccgcggatcgtgctccagcagcaaggggaagagggggtgagctctagcagcagtacaactccaacaacatccaacagcagaccacgatggctggagcagctgggggtcatccgcacggactggacgcgggaggagattgcagaggtgtaccacacacctatcctggaccttgtatataatgcagcaacagtacaccgcatgtacaatgacccccaaatggtccagcgatgtacgctgctgagcatcaagaca…
biotin synthase	mRNADt28580	atgattcctgtcgtgggccgtcgtctgctccatcaactggcagcagccgaggcaactacattgctgcccgtgaccgccagcagggcgtacaccacgccctcggtgcagcagcaggcagaggcagccacgcaggcagtcgcggcggccccgcggatcgtgctccagcagcaaggggaagagggggtgagctctagcagcagtacaactccaacaacatccaacagcagaccacgatggctggagcagctgggggtcatccgcacggactggacgcgggaggagattgcagaggtgtaccacacacctatcctggaccttgtatataatgcagcaacagtacaccgcatgtacaatgacccccaaatggtccagcgatgtacgctgctgagcatcaagaca…
biotin synthase	dtdenovo1816/dtcontr890/dt2M0h918/dt2m30m902/dt2M4h914	atgattcctgtcgtgggccgtcgtctgctccatcaactggcagcagccgaggcaactacattgctgcccgtgaccgccagcagggcgtacaccacgccctcggtgcagcagcaggcagaggcagccacgcaggcagtcgcggcggccccgcggatcgtgctccagcagcaaggggaagagggggtgagctctagcagcagtacaactccaacaacatccaacagcagaccacgatggctggagcagctgggggtcatccgcacggactggacgcgggaggagattgcagaggtgtaccacacacctatcctggaccttgtatataatgcagcaacagtacaccgcatgtacaatgacccccaaatggtccagcgatgtacgctgctgagcatcaagaca…
carbonic anhydrase	mRNADt3379	gttttcattcaattttacctgtatactccaccttgtctgcgcgtccgctggagtacgccaacttggggagttcgagctgtctgcggcaggatgggatcccgccgcatcaccctcttgggggctctgttcgctgtcctggcggtcgcaatcgaagggcgtaccctgcttacacacaacctgaaggccgaggctgctgagacagtggatgcagtgagctctgtggtagctggttctgcaggcaggcagttgctggtgagtgagcctcacgactacaactatgagaaagttggctttgattggacggggggggtctgcgtcaataccgggaccagcaagcagagcccaatcaacattgagactgacagcctggctgaggaatcagagaggctggggaccgcg…
carbonic anhydrase	dtdenovo4672	ctgtatactccaccttgtctgcgcgtccgctggagtacgccaacttggggagttcgagctgtctgcggcaggatgggatcccgccgcatcaccctcttgggggctctgttcgctgtcctggcggtcgcaatcgaagggcgtaccctgcttacacacaacctgaaggccgaggctgctgagacagtggatgcagtgagctctgtggtagctggttctgcaggcaggcagttgctggtgagtgagcctcacgactacaactatgagaaagttggctttgattggacggggggggtctgcgtcaataccgggaccagcaagcagagcccaatcaacattgagactgacagcctggctgaggaatcagagaggctggggaccgcggatgacacttcacgcctg…
carbonic anhydrase	dtdenovo4673/dtcontr2292/dt2M0h2302/dt2m30m2304/dt2M4h2325	ctgcgcgtccgctggagtacgccaacttggggagttcgagctgtctgcggcaggatgggatcccgccgcatcaccctcttgggggctctgttcgctgtcctggcggtcgcaatcgaagggcgtaccctgcttacacacaacctgaaggccgaggctgctgagacagtggatgcagtgagctctgtggtagctggttctgcaggcaggcagttgctggtgagtgagcctcacgactacaactatgagaaagttggctttgattggacggggggggtctgcgtcaataccgggaccagcaagcagagcccaatcaacattgagactgacagcctggctgaggaatcagagaggctggggaccgcggatgacacttcacgcctggccttgaagggcctactg…
Chlorophyll A-B binding protein	dtdenovo23401/dtcontr11519/dt2M0h11525/dt2m30m11617/dt2M4h11547/dsdenovo12729/mRNADt6217	atgctgaccatccaagcatccaaggcctctgccaaaatgatgatgggtgcctcgcctcgctcgctgggggcctctcctctgcgcgctgtccgccccctcccgtctgctcgcagggcacctgtgacgcaggccgtgttcaagggccaggacaagaggagcaaggaggcacctccccccaagcccaagcccctcaggctcggattcactaaggacaacgagctctttgtgggccgtgctgccatgcttggcttcgccttctccctggtgggcgagatcttgactggcaagggtgccctggctcagctgggttatgagatctttgacgacaagctcaacatcgaccagattgatgagctggtgattggcttgattatcttcaacctgatcgctgccattttg…
Chloroplast envelope transporter	dtdenovo2437/dtcontr1175/dt2M0h1202/dt2m30m1185/dt2M4h1203/mRNADt20409	atgctcctccaacggcgaggaggcttagctgcaacgccatgtgcccgggctggtggcgcagcgcagcaaggggttgcacgcctgcccgcgttgctgcgcaccagcagcaggatccccgtcaggcagcagggaaggaggaaggctggcctgcgatgcagggccgcagaggcagaacagcagcagcaggagggagaatcggtgcttgccaccagcagctttgaggatcctatgcccacaaggaacaaggcgttcccgtacccaatgcagaaggaccagcagcaagccgcgctgtcctccatcccctggccgttgttctaccccgcgatggcagcctgcgtcagcgcggtgggagcagccggttttggagcgggcaaggcactgccagtggagcctgagaac…
Chloroplast envelope transporter	dtdenovo2437/dtcontr1175/dt2M0h1202/dt2m30m1185/dt2M4h1203/mRNADt20409	atgctcctccaacggcgaggaggcttagctgcaacgccatgtgcccgggctggtggcgcagcgcagcaaggggttgcacgcctgcccgcgttgctgcgcaccagcagcaggatccccgtcaggcagcagggaaggaggaaggctggcctgcgatgcagggccgcagaggcagaacagcagcagcaggagggagaatcggtgcttgccaccagcagctttgaggatcctatgcccacaaggaacaaggcgttcccgtacccaatgcagaaggaccagcagcaagccgcgctgtcctccatcccctggccgttgttctaccccgcgatggcagcctgcgtcagcgcggtgggagcagccggttttggagcgggcaaggcactgccagtggagcctgagaac…
cold shock protein domain	dtdenovo16089/dtcontr7904/dt2M0h7911/dt2m30m7969/dt2M4h7929/dsdenovo8687/mRNADt8318	atggaagcccaagtggatgcagctgcgacgaatgagcaacaaccccagacgcaggagacccagcagcagcaacaacaacaggatagtttagcgcagcagcctgcgggccctaggcatgaaggcgtctgcaagtggttcaatgcgaccaagggcttcggttttatcacgccgctgtcgccgcaagaaggagtgggtgcgggggaggatttgttcgtccatcagagcaacatcgcctctgagggatttaggtccttgcgcgagggggagagcgtagaatacgacacggagactagccccgatggccgtaccaaggccattaacgttacaggtcccaagggtagcccgccacagggcgcacctccacgcaatcgggttccagggaatagctatggtgcaggg…
CP12	dtdenovo16649/dtcontr8173/dt2M0h8176/dt2m30m8238/dt2M4h8196/mRNADt19136/mRNADt19137	atggctctcgctttccgcaaggcttccgtggctgtgcccaccaaggcaggcactgcaccccgcgtggctgcaccccgcccctccgtccgcgccagccgtgtggccatgagggctgagccccagcaacagtccgccatcgagaaggccctgcaggaggccgaggagtgcggcgaccccaagtccaaggagtgcgctcccgcctgggataacgtggaggaggcctccgctgccgccgcgcacaagaagcagaacgagacccaggaccccatggagaagttctgcgaaggcaacgaggacgctgatgagtgccgcgtgtacgagtaa
Ctr copper transporter family	dsdenovo10172	atgggggccgtagtgaagctggcgaaaactgcgcttttatttgcactgcagtgcgccgcaagtggaagcagggagacacaaggagcgatctcgaccgttggaactggcaggagggggctgctgcaacatggcagcagttcaaggagtggaggcaacgtggaggtcatggcagcacccgacaactgctatgagacccccacgaaagcagagtgcgaggactaccagtacccagagtcacggactgagggggacatcggaatgctttgcaacgctatgccagatatgcccggatgcagcctgtgggaggcatgcaaggagaacaaagtgaagagcagcaatgaggtgtgtaactccatggtggtgctggctaccatctgtgaggacatgccgggcatgggc…
DnaJ-like protein / heat shock protein 40 kD	dtdenovo15035/dtcontr7407/dt2M0h7417/dt2m30m7463/dt2M4h7443/dsdenovo8159/mRNADt68	atgcaagccggaaagctagggacgagaataggagggggccatgcgggagtgcagcaacctcagccgttgaggcagctggctggaggtcgccctgtgtcatcccggcctcgactgaacagccggagaggcgccgtggtcgtgcgagcagcggactattacagcctgctgggcgtgagcaaaaatgcggacaagaagcagattaagcaagcctacagacaagcggctcgaaaataccacccggatgtcaaccgtgagcccggtgcagaggagaagttcaaggaaattggtcaggcttatgaggccctgtccgatgataacaagcgtgccatctacgatcgctacggagaggctgggttgaagggcgggatgggtggaatgggtggaatgggcggcatggga…	atgattcctgtcgtgggccgtcgtctgctccatcaactggcagcagccgaggcaactacattgctgcccgtgaccgccagcagggcgtacaccacgccctcggtgcagcagcaggcagaggcagccacgcaggcagtcgcggcggccccgcggatcgtgctccagcagcaaggggaagagggggtgagctctagcagcagtacaactccaacaacatccaacagcagaccacgatggctggagcagctgggggtcatccgcacggactggacgcgggaggagattgcagaggtgtaccacacacctatcctggaccttgtatataatgcagcaacagtacaccgcatgtacaatgacccccaaatggtccagcgatgtacgctgctgagcatcaagaca…		atgattcctgtcgtgggccgtcgtctgctccatcaactggcagcagccgaggcaactacattgctgcccgtgaccgccagcagggcgtacaccacgccctcggtgcagcagcaggcagaggcagccacgcaggcagtcgcggcggccccgcggatcgtgctccagcagcaaggggaagagggggtgagctctagcagcagtacaactccaacaacatccaacagcagaccacgatggctggagcagctgggggtcatccgcacggactggacgcgggaggagattgcagaggtgtaccacacacctatcctggaccttgtatataatgcagcaacagtacaccgcatgtacaatgacccccaaatggtccagcgatgtacgctgctgagcatcaagaca…
EF hand family protein	dtdenovo22262/dtcontr10944/dt2M0h10951/dt2m30m11037/dt2M4h10979/dsdenovo12043/mRNADt25517	atgaaagtgtttgggcaagaagtttttgcccctcgatttggcataaggctgacgcagtctccatactttgaggccgcatgcacgcgtgctttccatgaggtagacatggatcaggatggccagctggacttcaaggaattctacattgcagttttgcgcctgtacgacttcttgaatgagaagctgccatgccatttgaagatcccctccacgaatcaaatgaaggacatgatggccaagcacgacaaggactgttcaggacacctgagctttgaggagttcctttcaatgtgcaaagagatggccggtggcaatgggaagttccgggactcgctcctgttcaaagccacgattgtgctaggtatcaagcttgtggcgcttccactggcaggcaaggtc…
ELMO/CED-12 family	mRNADt25099	atgagaaggaggcacacagataagatgcaggagcccctgctccctccggaccaagcacggccacaaggcttgcaggcccatgaggcccaggaagctcaacctggattcctgcagaaatgtctctcctatcttcgttactggcttggccgcattatctcgtacatcctgaagattgttcggcctctgaagggagagcacaagctgcctttgatccaggcacagcaagtacaggatcttcgcaatgcagcaggcgaaagatatgacgagacaatacttgagcacagagattccctgaagcagctgtgggagcacgcttttccaacaactccgttcccaccagacatcaagagtccactgtggaaggaaatgggctggcagggcgaggaccctggcactgat…
ELMO/CED-12 family	dtdenovo12796/dtcontr6321/dt2M0h6343/dt2m30m6381/dt2M4h6355/mRNADt25101	atgagaaggaggcacacagataagatgcaggagcccctgctccctccggaccaagcacggccacaaggcttgcaggcccatgaggcccaggaagctcaacctggattcctgcagaaatgtctctcctatcttcgttactggcttggccgcattatctcgtacatcctgaagattgttcggcctctgaagggagagcacaagctgcctttgatccaggcacagcaagtacaggatcttcgcaatgcagcaggcgaaagatatgacgagacaatacttgagcacagagattccctgaagcagctgtgggagcacgcttttccaacaactccgttcccaccagacatcaagagtccactgtggaaggaaatgggctggcagggcgaggaccctggcactgat…
Enoyl-(Acyl carrier protein) reductase	dt2M0h552/dt2m30m540/mRNADt31767	atgcacatgcagctttccaagtcatcaatttcttgtggatttcacgctaaagcctcatcaaggcaaaagactagggcaggttccacagacaggaggcaccttacctcagctcccactaaggcaatggcccagcggcatgtttgtgagcccacatggtggtcgcgtgatacagttgccgttgtcactggagcaaacaagggcttgggccttgagtgtgctcgccagctggcgtgtgaggctggcttcctgactgtgattgcggcgcgaaacgagaaggctggccgggaggctatcaagtccctagaacagagctctgggggcagtgcacgcttggacttccacccacttgaggtcactgacaataaatcaattgaagcattcaagaattggctgcagcat…
Enoyl-(Acyl carrier protein) reductase	dtcontr538/dt2M4h547	atgcagctttccaagtcatcaatttcttgtggatttcacgctaaagcctcatcaaggcaaaagactagggcaggttccacagacaggaggcaccttacctcagctcccactaaggcaatggcccagcggcatgtttgtgagcccacatggtggtcgcgtgatacagttgccgttgtcactggagcaaacaagggcttgggccttgagtgtgctcgccagctggcgtgtgaggctggcttcctgactgtgattgcggcgcgaaacgagaaggctggccgggaggctatcaagtccctagaacagagctctgggggcagtgcacgcttggacttccacccacttgaggtcactgacaataaatcaattgaagcattcaagaattggctgcagcataagtac…
fructose-bisphosphatase	dtdenovo7553/dsdenovo4059	atgaagtcaacaacgcagggtttgttgaagggcggaggcctcggggggagggccccggttccagtgcgtgcccctcagtggaagagcgtgaggagcgtgcgccctgtccgcgtggccgaggagggcgtggggcccgactacagtgcggtacagcgtaacttggcgctggagattgtgcgtgtcacagaggcagcagcgctggcatcagggcgctggctgggccgtggcgacaaggaggcagctgatcaggctgctgtggacatgatgcgcaaggtgctgaacggcgtacgcatggacggtgtggtcgtcatcggggagggagagaaggatgaggcccccatgctcttctgcggagagcgcattggccatccctccctacaccccaagatcgacattgct…
Galactokinase	dtdenovo6237/dtcontr3077/dt2M0h3093/dt2m30m3103/dt2M4h3104/mRNADt32366	atggcagacctagtgccagtccagaaggatcttgcggtttcatatggccctgcagcaggggagctggagcctcggtatgaacagctgcgtagtgccttcagcaaaacctttaatgcagagcctgaatgctttgcgagggcaccaggccgtgtcaacctaattggtgagcacattgactacgaggggtatggcgtgttgcccatggccattaagcaggacaccatcgttgctgtcaagaaagggggtgacaagcttgtaatcagtaatgttgacgggaatgcatacaagacccagacttacgagaccgatcccaagcaggaggtcgacgtggccaaccacaattgggctaactactttatgtgtgcctacaagggcgcttttgagctcctggaggtaaag…
gamma carbonic anhydrase 3	dtdenovo4140/dtcontr2032/dt2M0h2042/dt2m30m2038/dt2M4h2060/mRNADt27491	atgcttgcactcaaccttgccaagtcggtggcctggcgggtggggtttgccatcagggagtcagggcaggctctagagagggtaggctgccggctgcagggcatctactctcacgaagagcagctgtgccggcacatgcccagcttgcccgtccagtatgatgcgccctcttctgcacccggctcctttgccgctccctcgagtctgatggtgggcaacgtcagcttgggccgttcctcttcactgtggtacaacgccatcgtgcgaggtgacctgaagggtgtgtccattggcaacaacacaaacattcaggacagtgcctatgtgggagccagcagcgagtacagccctcctgttgagatcggcaacaacgtgtccattgggcatggtgctgtcatc…
glutamate dehydrogenase	dtdenovo5946/mRNADt30752	atgcttcccaggcttgtgagggcatgcaagggcacgtgtataaaccctttcctgagttttgggggaaaagctctatattcttcagccacaatattgcccccgcatctagagcctggacaagccagtacactggctgacgaagcaaggttgcctcctcatgctaggtataccgaaagccctaccaccttctatgcgcaacaggccttggagcatgctgacatcaatccagggatccagaaggccatcattcacccggatggcgagctgactgtagcgttgccggtgcccaatgctcagggggagatagagcttttcaacgcccacctggtcatgcataataatgcgcggggaccgtttttagggggcctcatgtatcatccagacgtcaatcttgatgcc…	atggccgctctcttgaagtccaactgcatggcgcagaagagcctggctgcccgccccgtgcggagccttgctaccgtggcgccccggccatctcgtgccctggtggccccagtgcgtgcatcttccgccgctgtgtccgaaattgtggacaagctgaagaccctgaccctgctggaggctagcgagctggtgtcagagattgagaccaccttcggcgtggatgcttctgcggcagctgctgcacccgtggccgttgctgctgctcctggtgctggtgctgcagcccctgctgctgaggaggagaagactacctttgatgtcgtgcttgaggaaatccctggtgacaagaaggtggctgtgtacaaggcagtgcgtgccattgctgacatccccgtgaac…
glutamate dehydrogenase	dtdenovo5947/dtcontr2922/dt2M0h2942/dt2m30m2948/dt2M4h2953	ctggctgacgaagcaaggttgcctcctcatgctaggtataccgaaagccctaccaccttctatgcgcaacaggccttggagcatgctgacatcaatccagggatccagaaggccatcattcacccggatggcgagctgactgtagcgttgccggtgcccaatgctcagggggagatagagcttttcaacgcccacctggtcatgcataataatgcgcggggaccgtttttagggggcctcatgtatcatccagacgtcaatcttgatgccctaaggagcctggcagcactgaacacgtggaaatttgctttgtttgatttgccgctggggggtgctaagatgggtgtggcatgcgatccgcggggcatggacatccggatgcaggagaagttgacgcga…
glutamate receptor (GLR)	dsdenovo6800	atggtctccgcccacggaaagcagcagcagcagcagcaggagcacattgtggaggtgcctgcatctagcaagagcagtgaggtcatagctgctgtcatcgctgcagcgcaagagagtcacagccgctcaacctcaagcaaatggctccagattatgtttgcaggagttgttatgttcggactgatcatctattttagagaagagatttgggcttttggcagagatgtgcagcggcatccgctaatggcgcaagcagagcaaatgcagattcagcactaccttggaacacaggtgtcggcgattgacgcctttgcgatggaatacacccccaagacgttcattggtggcttgctcacactccatgtttggatggcctccatcatctatgtcgtaattatg…
Glutathione S-transferase	mRNADt22968	tcaagcagaagacggcatacgagatatgtcgtggtgtctcgtgggctcggagatgtgtataagagacagtccatgccacacctcaagcttgtgtacttcgacctacctgggaaggcagagacgacacgcttgcttttgaccatgggcggcatgccttttgaggacgcaaccttcggatttgataagtggggagagctgaaggcgtcgatgccctatggccaagttcctgttttggaggtagatggcaaggtgctggcgcagtcatccgccattgagcgctatgctgccaagctcacaggcctgatctctgctgacccttgggcagccgcaaaggaggatgagatcattgccttccagcaagagatgctggacctgttcattccctcgtacaccattaag…
glyceraldehyde 3-phosphate	dtdenovo17529/dtcontr8646/dt2m30m8712/dt2M4h8668	atgcccgcctttgctctggccagccccgccaaccgggctgcgtttgtgcgctccgctgccccatgcgccaccacccgtccctcccgtgccgccgttcaagccatcaaggctgaggctggcaagcctgtgaaggttggaatcaacgggtttggcaggattggcaggctgtgcctgcgcaatgccctgcaccgcaaggacattgaggtggtggccatgaatgacccattcattgatgctgagtacgccgcatacatgtttaagtatgactcaacgcacaggatgtggcctggcacggtccaagcaaaggacggcagcctcatcattgacggccacaccatcaagggcagcgcctccatggaccctaagcagatcccctggaaggatgctggcgttgactat…
glyceraldehyde 3-phosphate	dtdenovo17530/dt2M0h8635/dsdenovo9455	atgcccgcctttgctctggccagccccgccaaccgggctgcgtttgtgcgctccgctgccccatgcgccaccacccgtccctcccgtgccgccgttcaagccatcaaggctgaggctggcaagcctgtgaaggttggaatcaacgggtttggcaggattggcaggctgtgcctgcgcaatgccctgcaccgcaaggacattgaggtggtggccatgaatgacccattcattgatgctgagtacgccgcatacatgtttaagtatgactcaacgcacaggatgtggcctggcacggtccaagcaaaggacggcagcctcatcattgacggccacaccatcaagggcagcgcctccatggaccctaagcagatcccctggaaggatgctggcgttgactat…
HAT (Half-A-TPR) repeats	dtdenovo8590/dtcontr4226/dt2M0h4256/dt2m30m4270/dt2M4h4262	atggcggacacggtggccatggtcatggaggccatgctgcccgagttggatgacctggagagcaagggctacttcagccgttcggagctcagggaggtcatcaagaagcggcaagattttgagtacaacttcaagaggagggcagcactgaagcgcgacttcttgaggtgtatagagtttgagactaagctggaggaactcagaaaacaccgcaaaaaggcactgaagattaaaggaaagaggggtcctgcggagacgggtatcgtgcgtcgcatccacttcacctatgagcgcgccacccgcaaattcaaggccgacctggacttgtggctcgcgtggattgactactgcaagtcaagcaacagcaccaagcagatgtccaaggtggtaaccaaagcg…
HAT (Half-A-TPR) repeats	dsdenovo4617	atggcggacacggtggccatggtcatggaggccatgctgcccgagttggatgacctggagagcaagggctacttcagccgttcggagctcagggaggtcatcaagaagcggcaagattttgagtacaacttcaagaggagggcagcactgaagcgcgacttcttgaggtgtatagagtttgagactaagctggaggaactcagaaaacaccgcaaaaaggcactgaagattaaaggaaagaggggtcctgcggagacgggtatcgtgcgtcgcatccacttcacctatgagcgcgccacccgcaaattcaaggccgacctggacttgtggctcgcgtggattgactactgcaagtcaagcaacagcaccaagcagatgtccaaggtggtaaccaaagcg…
Heat shock chaperonin-binding motif	dtdenovo5224/dtcontr2561/dt2M0h2577/dt2m30m2577/dt2M4h2597/dsdenovo2785/mRNADt5124	atgaggtgcttttcgtctaagccgggcttggtgtccagcaggagggtggcaggcggtcatgctcctgctaagtcccctgctctcctgaccaggggcccccgcctgccccctcgtgtaaccctcaggaccatggttcaagctggcagcagcgtggaatccagcccccagcaacaagagcaaatagctgctcagcagcagcaaccacagcagcagccaccggcaccgacccctgagggccagtatgtccctcctcctgcccccatgatgatgccaccacccccgctcaatcctgatggcacccccatgagcacggctacctacatgccccagtatccccagggatacccaggcatgccggtccgctcgcctcaggacatgtatatggcatcgccctatgcc…
heat shock protein 70C	dtdenovo17891/dtcontr8827/dt2M0h8817/dt2m30m8898/dt2M4h8849/dsdenovo9650/mRNADt32869	atgctgccgcaactgtgccggggcttgctggcgaagcaggccaccagctcgctggaggcactgggctctcgtgccatcagcacatcaagctccctgcaagacgctgtgatcggtatcgacctgggcacaaccaactcatgtgtggccgtcatggagggcaaattgcccaaggtgattgaaaatactgagggtacacgcaccaccccctccgtggttgctttcactcctaagggagagcgtctcgtgggattgcctgccaagcgccaggctgtcaccaactctgccaacactgtgtcagccaccaagcgattgataggcagggggtttgatgaccctcagactcagaaagaggtcaagatggtgccctacaagattgtcaagggaccaaccggagacgcc…
Hsp20-like chaperone	dtdenovo20209/dtcontr9943/dt2M0h9923/dt2m30m10025/dt2M4h9961/dsdenovo10915/mRNADt23623	atgcctgctatccccactgtcctctgggcacagagaagtgacaagctgtatgtcactctcgatgtgcaggatgtgaaggacgagaagctggacttgagcaacgtagacgggtcgggaaaactctcgttcaatggaaagcgagcagaatctgcaggcagtccagagcaggaatacgccatggagcagcagttgtacggtgagattgatgtggaggccagcaaggtcagcattacgccccgcaacgtgttcatggtcattcagaagaaggagccccatggcttctggccccgcctcacgaaggagagcggcaggcacctgacgcacattaagacagactggagcaaatgggtggatgaggatgaggaggatgagaagccagagatggacatgtcaggctac…
Hsp20-like chaperone	dtdenovo20209/dtcontr9943/dt2M0h9923/dt2m30m10025/dt2M4h9961/dsdenovo10915/mRNADt23623	atgcctgctatccccactgtcctctgggcacagagaagtgacaagctgtatgtcactctcgatgtgcaggatgtgaaggacgagaagctggacttgagcaacgtagacgggtcgggaaaactctcgttcaatggaaagcgagcagaatctgcaggcagtccagagcaggaatacgccatggagcagcagttgtacggtgagattgatgtggaggccagcaaggtcagcattacgccccgcaacgtgttcatggtcattcagaagaaggagccccatggcttctggccccgcctcacgaaggagagcggcaggcacctgacgcacattaagacagactggagcaaatgggtggatgaggatgaggaggatgagaagccagagatggacatgtcaggctac…
Isy1-like splicing family	dtdenovo20647/dtcontr10188/dt2M0h10174/dt2m30m10265/dt2M4h10212/dsdenovo11190/mRNADt11089	atggctcgtaatgaggagaaggcacaaagcacgctcaacaggtatctggctgccaaggttgaggaggagcgggggcctaaacagaagcgaccattcctagcgacagagtgcagagacttgaatgaggcggacaaatggaggcaacagatactacgagagattggaaagaaggtcatggagattcaaaatgcagctctgggagaacacaggattcgtgacttgaatgatgagatcaacaagttgatacgagagaaggggcactgggagcggcgcattgtggagctggggggccctgactactcgaagtctgcacccaaagtggcggacagcagagggcgggaagtggcggagatgacaggcaagggcacgggatacagatactttggggctgccaaggcg…
ketohexokinase activity	mRNADt27515	atgcaagcaagctcgatgcaagcagccaatgctgtgagtaatcacttgtgccctcctcaggttaccaagagcaggtctcatttggtcagaagaaagatgaggcattgcagggcaacagttcctgcggcagggcaggtcgtagatgatgcgcaggctcagccacagcctgcccagccgaccggcacaagaagagctgtgtgcagcgcggccatcagcctcgccatcagcctggccaaccaagagcctgctgatgccaagggctctgatgacaagctgtacaaagccttcatagatgctttttctgctcaaggctttgaggcccaagatgcggcctggacgagagccatcaacctggcaccagagaactctgcagcatggagcaaccggggcactctgcgg…
large subunit ribosomal protein L11e	dtdenovo11954/dtcontr5903/dt2M0h5933/dt2m30m5954/dt2M4h5934/mRNADt33770	atgatcacttctgtacaaatgagaatgatcacttctgtacagatgagaaaggtcactcctgtacaaatgcaagtaccaagcaaatggactgtgcttgcggtgattgctggcaggtctgcatttttcaagctggcccttgctgcggaggatcagacagttctgccccacgtactggacatgctggccacacagggccgcatgaagtatctcaggccacttttccgcgcactgttcaagagtaaaatgggcaaggatgcagccatcgaggccttcaagcaaaacgaggactcttaccatcccatcgccaagaaaatggtggcagccgatctggggctgtga
large subunit ribosomal protein L30e	dtdenovo5137/dtcontr2509/dt2M0h2526/dt2m30m2527/dt2M4h2547/dsdenovo2737/mRNADt6167	atggcccccaaggcagcagccggccccaccggacagcaggccgcagcccaggccgctgaggctaagcgtgccgccaagaagtcagccgagaacatcaacagccgtctggccctggtcatgaagtccggcaagtaccagctgggcttcaagactgccctgaagaccctgcgctctggcaaggccaagctcctgattgtgtccaacaacattcctcctgtgaggaagtccgagctggagtactacgctatgctggccaagaccggcgtgcaccactacagcggcaacaacatcgagctgggcacgtcctgcggtcgctacttccgcgtgtccgtgatggccatcaccgacgctggtgactccgatatcatcaaggccatgcccaccgactaa
large subunit ribosomal protein L6	dtdenovo2928/dtcontr1419/dt2M0h1445/dt2m30m1432/dt2M4h1452/mRNADt10088	atgttggctcagcaacgtgccttctcgagcgcagcctcttcctcagccccaaggcagtcttttagccgggtgcaactgaacgttgtggcgcgggagtctcgtatcggtggcaagcccatccccgtgcccaagggcaccaccatcactgtggatggactgacggtgaaggccaagggccccaatggcgctctggagcacaccatgaccccctatgtcaagctggagcagacgacagagatgttgaggatgtaccggggagaggagaccaagctggccaacgcacagcatggactccaaaggacgctgctggccaacatggtgaccggcgtgtccacgggttttaccaagaaattgcaattattcgggacgggttaccgtgcaagcgcaaccaacaaggag…
major light-harvesting chlorophyll a/b protein 3	dtdenovo14976/dtcontr7379/dt2M0h7391/dt2m30m7432/dt2M4h7416/dsdenovo8131	atgtccatgttgatgaagcagctggccaagcccaccctgaagaccggtgtctccaggaggcaggtgcaggtgaacgcccggcgcaccgtgaagccctccaagggatccacccccgacagcgcctggtatggtcctgaccgtcccctgttcctgggctccctgtccggtgagcccccaagctacctgactggcgagttccccggcgactacggctgggataccgctggtttcagcgctgaccctaccaccttcgcccgctacaggaccatcgaggtcatccacgcccgctgggctctgctgggtgctctaggcattgtgacccccgagatcctggcccagaacggtgtgcctttctctggagatgccgccatctggttcaaggctggctctgagatcttc…
mitochondrial pyruvate carrier 2-like	dtdenovo20008/dtcontr9852/dt2M0h9832/dt2m30m9933/dt2M4h9871/mRNADt29914	atgaccagctttggagctcgtgtgaaggatttcatcaaccatccagcgggtcctcgaaccatccacttctgggccccaacattcaaatggggcatctctatagcaaacattgctgacctgcagcgccctcctgagaaggtgtcctaccctcaacagcttgccattactgccacaggcctcatttggtcgcgctacagcactcagatcacccccgtgaactacaacctgctggccgtgaacgtgttcatggccatcactggctcctaccagcttttccggaagatgacgtctgagaacaagccacagcccatggccgcgccctcgccctcttcctaa
MTERF superfamily	dtdenovo18932/dtcontr9349/dt2M0h9342/dt2m30m9423/dt2M4h9371/mRNADt10446	atgctgcttaaacacttctcgcaaggccgggccgccacttgtgggcgtgccagcagcactggcagcagtagcaatggcgtacgtttggtgcagcctgttcgcggcagtgcagcaaagcacggcggggagccaacaaaccacaccctgttgcaagcgtcagttgggctcgtctccgagaggagcagcttggtgcccacgaaggctgcactggctgacccggtgacctccacctccagcttctccagcatgctggatgatgacagtgactatgatgagcagcaagaagtcattcaagtggacatggcagaggaggacccctctttgaaggtggagaaccttggcctctcgccggtgactgtggcagctttgcagaaacgaggaattcagtctctgtttcct…
Nuclear protein 96	dsdenovo3426	atgggcctgatgaaaagatcttctgcagtccctcctgcctcaggggcttggggccaggagccctccccctatcccccaccctatccagaagttcctgaggatccctcccaatccagcagggacccatatgccggcatgtccgagcaagaggcatatgaccaggacctcctaaaaaaaagctccgtcacaaccaagaacctgagctttgttgccttttggctgcaatttgcgctgtcggtagtgtcagctggcatcctgctgttctctgtagccttcgttcccaagggtccttataatgtcagtagcgcggtggatgcaagcaagtatttgaccctcgtgggtgtcattgctgccctcatctcatcgctcatggcacatgggttcttgaccatgagccgc…
phosphofructokinase (PFK)	dsdenovo4200	atgaatttctcgctcaacaaaaacaagaagcccacctctgttgcagctgtgtttggggacagcagtgacgaggaggatgccccacaacagcagcaggctgggaaaaagggggcagcaggcagccagccaaagcaaagcactccagccccagtgtctgcttctgacataaggagctgcgcagacaagttggcggagtgggtggctaagaatggcaggcaatttgaggacctgaccagggacaagaaccctggggagacaccattcaagttccttcatgataaaaagagcccagactacgcttactacagtgccaaggtgcaagaatgggagacgaagttaggcaaagctgcccctcccctacccacacctgctgcaactcctgccccagcaccgcccaat…
photosystem I assembly	dtdenovo4934/dtcontr2420/dt2M0h2429/dt2m30m2431/dt2M4h2448/mRNADt20962	atgcttgcaaacaagggcaaacagctgctccccttgagcttgagtggcaagagcaatcagctccatgctacaacatgctcggctagcagagcaaggcataatctgagcaagcaccaacaacgctgcgtcatcctgacttctgcacagggcaacgagagcttcggagagtccgtgatgaaggtggccaaaaagattcagggttcactgccaattgttgggctcatctctaggcttgcatcacctcagggcggctttgatgaactcgcatacaccgagtatagccgcagcatcatcgaaacttcctctgaggagatgcaaaatgctctggcagattttgaaaagagacatggcaaggttggctccagtagatttgtgctactcttgttgtggatgtctaag…
photosystem I light-harvesting cholrophyll-a/b protein 2	dtdenovo8231	atgcagcgtactttcggcgcatctcccgtggccaagcaggccgtgaacaggagcgtggtgcgcccaagcatccgggtgcaagcgcagcgtgcaggcaactttgcccctggatccgagcccaaggagtacctgaacgacctgcccggaaacttcaactttgaccccctggagctgggtaaggagaagggcaccctccagcgctaccgcgaggccgagctgatccactgccgatgggccatgcttggagccgctggctgcttggcagtggaggtccttggccttggcaactggtatgatgctcctctgtgggctgtgactggcgataagcccacctggtttggtattgaggtgcctttcgacattgccaccattctgggcgtggaggtggtcgctatggct…
photosystem II biogenesis protein Psp29	dtdenovo10196/dtcontr5024/dt2M0h5057/dt2m30m5074/dt2M4h5056/dsdenovo5536/mRNADt19479	atgcaggctagcttattgcaaagacaaggcgcaggcagcgtcgtgaagagcagcaggcccgccccgctctccaccagaccctgccctgctctccagcagcgcccatcgcgatcagctggccgtcgggcgtcagtgaatgtacgcgccagcagtgtcaccttccccacggtggagcagaccaagaaaaagttcatccatggctacaagaagcccatcgccgggatttacaacgccgtcctgcaagagctgcttgtgcagatgcacttcatccgcttcaacctgagctacgagtacaacgaggtgtttgctctgggcgtggtcagcgtattcgagcagatcctggagtctttccccagcaacgagcgcgaggtggtgttcaaggcgtacattgaagccctg…
Photosystem II Pbs27	mRNADt30253	atgaagcacacacagttaaagactcagcattctactggtttggctaccaagccacatcatcgtgtacttgcagtatgcaagcacagttcaatacgttatgcgtgccaagtcagctgccagtgtgatcgtaaggacgcattagggaatctctcccatgcctcaacatcagcagatcctgatagatggccaaatagtcatggagtggaccgccgctctgccctagccatgggggcagcgctgcttggagggccgacccgagctctttgtgggcttcctgctcaggcaaatgaggctccaactcctcccaaccagaagttacctaaggcctatgttgaggttgtgcaacgtgttatcaagtccctgcgggaatccatcgaggctgagcagaaggatgggaaa…
Photosystem II Pbs27	mRNADt30253	atgaagcacacacagttaaagactcagcattctactggtttggctaccaagccacatcatcgtgtacttgcagtatgcaagcacagttcaatacgttatgcgtgccaagtcagctgccagtgtgatcgtaaggacgcattagggaatctctcccatgcctcaacatcagcagatcctgatagatggccaaatagtcatggagtggaccgccgctctgccctagccatgggggcagcgctgcttggagggccgacccgagctctttgtgggcttcctgctcaggcaaatgaggctccaactcctcccaaccagaagttacctaaggcctatgttgaggttgtgcaacgtgttatcaagtccctgcgggaatccatcgaggctgagcagaaggatgggaaa…
photosystem ii reaction center w	dtdenovo3531/dtcontr1725/dt2M0h1736/dt2m30m1726/dt2M4h1759/dsdenovo1876/mRNADt2701/mRNADt2702	atgctggccaccaagcaaatcagccaggtgcaggcccagaggccccttgccgcccgcggcgtggctcccctgcgcccccagcgcgtggtgtgcaaggcccagtgcagcaacaaggtggctgagattgccaagaaggccaccgccgctgccgtgactctgcccgccctggtgcaggcccacccagcattcgccctggtggatgaccgcttgaacggcgacggcaccggcctgcccttcggcgtgaacgacggcatcctgggctgggtgattgctggcaccctgggcaccatctgggccatcttcttcgtgtcccagaaggacttgggtgactttgagaacccagatgatggcctgaagattgatgacgagtaa
photosystem ii reaction center w	dtdenovo3531/dtcontr1725/dt2M0h1736/dt2m30m1726/dt2M4h1759/dsdenovo1876/mRNADt2701/mRNADt2702	atgctggccaccaagcaaatcagccaggtgcaggcccagaggccccttgccgcccgcggcgtggctcccctgcgcccccagcgcgtggtgtgcaaggcccagtgcagcaacaaggtggctgagattgccaagaaggccaccgccgctgccgtgactctgcccgccctggtgcaggcccacccagcattcgccctggtggatgaccgcttgaacggcgacggcaccggcctgcccttcggcgtgaacgacggcatcctgggctgggtgattgctggcaccctgggcaccatctgggccatcttcttcgtgtcccagaaggacttgggtgactttgagaacccagatgatggcctgaagattgatgacgagtaa
photosystem II subunit 28	dt2M0h11118/dsdenovo12222	atgcttcgcatcacgcttggtgtggcggcctcaacggcaggtgttgtgaggtcaagggcagccggtgcacccctcgccaggcgccccatcgtggctgccccccgcagcaacgtggcgtgtgatgccgcggccatgcagttcttccggggcgtgaatgagtccaacgtgccggatgtgcagctgatgaggagtcgcaccggcacgagcggatcggccaggattatctttgacaatcccagcctcttccaggccagctctgaaatgggagaaattacgggcctgtacctggtggatgatgagggtgagctgcagaccacggatgtcaaggccaagtttgtgaatggcaagccctcgtccattgaggcccgaatgaacttccgcacccaatttgagtgggag…
photosystem II subunit 29	dtdenovo22549/dt2m30m11205/dt2M4h11146/mRNADt25923	atgctgtcttctcgtaccgctccttccactgccggtgttgtgaggtcaagggcagccggtgcacccctcgccaggcgccccatcgtggctgccccccgcagcaacgtggcgtgtgatgccgcggccatgcagttcttccggggcgtgaatgagtccaacgtgccggatgtgcagctgatgaggagtcgcaccggcacgagcggatcggccaggattatctttgacaatcccagcctcttccaggccagctctgaaatgggagaaattacgggcctgtacctggtggatgatgagggtgagctgcagaccacggatgtcaaggccaagtttgtgaatggcaagccctcgtccattgaggcccgaatgaacttccgcacccaatttgagtgggagcgattc…
photosystem II subunit 30	dtcontr11107	atgcccgtcgagcagcgcacagcaccaccccttggccctggatttttcttcgacgcacttgcttcccttcacgtaatgcttcgcatcacgcttggtgtggcggcctcaacggcaggtgttgtgaggtcaagggcagccggtgcacccctcgccaggcgccccatcgtggctgccccccgcagcaacgtggcgtgtgatgccgcggccatgcagttcttccggggcgtgaatgagtccaacgtgccggatgtgcagctgatgaggagtcgcaccggcacgagcggatcggccaggattatctttgacaatcccagcctcttccaggccagctctgaaatgggagaaattacgggcctgtacctggtggatgatgagggtgagctgcagaccacggatgtc…
Piezo non-specific cation channel, R-Ras-binding domain	dt2M0h7367	atggctctgcatgtgcgcagcctgttggcagtgctaaccaccctagcagtggcttacaccaacagatcagcctcaggcttgaccttcctggcttctttcctgttgtggggctggaagtgcgttggtgtgcctggccatcagcttgcaggcaatgcacgctcgcagcggcatcgtcactgtgccgggctctggacctttgtgtccagcgcatcagccatgctgtttgcagctcaactcttcttgcaactcctgtacaccacgcaacttgtacagccccccagccagctgccccccttcaccccagacggcaagaatctctggcaatggtgcttctcatggtgtgtgctcgtactcggcctgggctggcgcggggtccagggagacgaagcagggggccta…
Piezo non-specific cation channel, R-Ras-binding domain	dtcontr7357	atggctctgcatgtgcgcagcctgttggcagtgctaaccaccctagcagtggcttacaccaacagatcagcctcaggcttgaccttcctggcttctttcctgttgtggggctggaagtgcgttggtgtgcctggccatcagcttgcaggcaatgcacgctcgcagcggcatcgtcactgtgccgggctctggacctttgtgtccagcgcatcagccatgctgtttgcagctcaactcttcttgcaactcctgtacaccacgcaacttgtacagccccccagccagctgccccccttcaccccagacggcaagaatctctggcaatggtgcttctcatggtgtgtgctcgtactcggcctgggctggcgcggggtccagggagacgaagcagggggccta…
Piezo non-specific cation channel, R-Ras-binding domain	dt2M4h7392	atggctctgcatgtgcgcagcctgttggcagtgctaaccaccctagcagtggcttacaccaacagatcagcctcaggcttgaccttcctggcttctttcctgttgtggggctggaagtgcgttggtgtgcctggccatcagcttgcaggcaatgcacgctcgcagcggcatcgtcactgtgccgggctctggacctttgtgtccagcgcatcagccatgctgtttgcagctcaactcttcttgcaactcctgtacaccacgcaacttgtacagccccccagccagctgccccccttcaccccagacggcaagaatctctggcaatggtgcttctcatggtgtgtgctcgtactcggcctgggctggcgcggggtccagggagacgaagcagggggccta…
Piezo non-specific cation channel, R-Ras-binding domain	dt2M4h7393	atggctctgcatgtgcgcagcctgttggcagtgctaaccaccctagcagtggcttacaccaacagatcagcctcaggcttgaccttcctggcttctttcctgttgtggggctggaagtgcgttggtgtgcctggccatcagcttgcaggcaatgcacgctcgcagcggcatcgtcactgtgccgggctctggacctttgtgtccagcgcatcagccatgctgtttgcagctcaactcttcttgcaactcctgtacaccacgcaacttgtacagccccccagccagctgccccccttcaccccagacggcaagaatctctggcaatggtgcttctcatggtgtgtgctcgtactcggcctgggctggcgcggggtccagggagacgaagcagggggccta…
Piezo non-specific cation channel, R-Ras-binding domain	dt2m30m7410	atggctctgcatgtgcgcagcctgttggcagtgctaaccaccctagcagtggcttacaccaacagatcagcctcaggcttgaccttcctggcttctttcctgttgtggggctggaagtgcgttggtgtgcctggccatcagcttgcaggcaatgcacgctcgcagcggcatcgtcactgtgccgggctctggacctttgtgtccagcgcatcagccatgctgtttgcagctcaactcttcttgcaactcctgtacaccacgcaacttgtacagccccccagccagctgccccccttcaccccagacggcaagaatctctggcaatggtgcttctcatggtgtgtgctcgtactcggcctgggctggcgcggggtccagggagacgaagcagggggccta…
Piezo non-specific cation channel, R-Ras-binding domain	dt2m30m7408	atggctctgcatgtgcgcagcctgttggcagtgctaaccaccctagcagtggcttacaccaacagatcagcctcaggcttgaccttcctggcttctttcctgttgtggggctggaagtgcgttggtgtgcctggccatcagcttgcaggcaatgcacgctcgcagcggcatcgtcactgtgccgggctctggacctttgtgtccagcgcatcagccatgctgtttgcagctcaactcttcttgcaactcctgtacaccacgcaacttgtacagccccccagccagctgccccccttcaccccagacggcaagaatctctggcaatggtgcttctcatggtgtgtgctcgtactcggcctgggctggcgcggggtccagggagacgaagcagggggccta…
plastocyanin/azurin family-domain-containing protein	mRNADt12853/mRNADt12854	tcaagcagaagacggcatacgagatatgtcgtggtgtctcgtgggctcggagatgtgtataagagacagtgtacatttgacgcaacaactccaagaacctcacagaaaatgcagatgatcaacaagaccgccgtgcgcgcccaggtggcccgccctgctgctaggcaggtgaagaccgctgccatgccccagaaggtggcccaggtggccggcgtggccctgagctccctggccctgaccatgtctgcccacgcagacgccatcgtcaaggccggttccgactctggcgccctcgccttcgagccctccagcgtgaccatcaaggccggcgagaccgtcaagttcgtgaacaacgccggcttcccccacaacgtggtgttcgatgaggatgccgtgccc…
Polycystin cation channel	dtdenovo10741/dtcontr5309/dt2M0h5340/dt2m30m5363/dt2M4h5345/dsdenovo5847/mRNADt9643	atgtttagaggcgtgtcacggcggcatcccaatgcgacaagttccgcagtattagaagaggaagaggcagcagatgctcacgccacaatttctgctgaggaagaaggagggcgcgagattgctgcccagaatgagcagcaccaccaaggcgaggtgcagcgacctgagacataccacgcacatcaagttgtgcgggagctatacacccgctacctcaagcagcaggagcgttaccgtggataccgcaacctgtttgtgttcctgggcttcatggcgctctttatggccatcctcttcacacagcgccaggccaacgcgtccttccaagtccacaggaccctgagtgacgtcctcgtgcccgaggacgatgtcatgggcaacgttaaccagctacataga…
polypeptide of the oxygen-evolving complex of photosystem II	dtdenovo20629/dtcontr10176/dt2M0h10163/dt2m30m10254/dt2M4h10200/mRNADt25665	atggctgccctgctccagaagtccgggctctccgcccccagcaaggtcgtggcccaggccaacaaggccgctccccgcgtgtcccaggtctgccgcgcccagcagcagggagcccccgatgtggaccgccgcgccgccctgggcatgtttgtgagcactgcctccctgctggctggcgctgctccctcctttgctgcatatggcgagggtgccaacgtgtttggccgcgtgaccaacaagtctggcttcgtgccctacgctggtgacagcttcgccctgctgctgcccagcaagtggaaccccagtgatcagaaggaggtggagtccattgtgcttcgctacgaagacaactttgatgctgtcaacaacttgtacgtggtcgaggacaagtctgacaag…
potassium:proton antiporter activity	dtdenovo13186/dtcontr6521/dt2M0h6540/dt2m30m6579/dt2M4h6554/dsdenovo7177/mRNADt5807/mRNADt5808	atggcctcccagtataaggatacatcgcaggcagtagatgtccatgcgcaaggacgcgcggaagatgaggaggaaatccacccatcagacttggaggtcaattttagcgacattgccaagcagttctccctcctcggttggattggctttggaggacctgctgcccatatcggcctatttcaaaagcggctggtggagaagctgcgatgggtgacatctggcgtgttcatggagctgtttgctctcgcacaatgcttgccaggccccaccagcacccaggtgtccttcgctatgggaactgtgcgccaaggcacttttggaggtctgctctctggtgccttgttccaggcccctggagccatcatgatgacatgcgtgggcattgctgcagctcacacc…
Protein-l-isoaspartate O-methyltransferase	mRNADt1750	atgagtaacggcacggggaaaatgcagaaagtcggacaacacgcgttggtaaacagtctggtccaacaaagactgcttgcaagcccaagaggtatagacgcaatgaagagtgtggatagggcagcatttatagacaacagattctataacaggatgtatgcttacgcggacgaacctgcacccattgggcatggccaaactatcagtgctccacacatgcatgctactgtcctcaagctcctggatgcgcagctcaagccagggcaccgagttttagatgttggatctggttctggctaccttgtagcagtgtttgccaagctcgtactgccaggagggtgcgtgcttggcttggaaaaggtgccagagctggcccagcgatccatctcaaacatccag…
Protein-l-isoaspartate O-methyltransferase	dtcontr341/dt2M0h354/dt2m30m340/dt2M4h350	atgcagaaagtcggacaacacgcgttggtaaacagtctggtccaacaaagactgcttgcaagcccaagaggtatagacgcaatgaagagtgtggatagggcagcatttatagacaacagattctataacaggatgtatgcttacgcggacgaacctgcacccattgggcatggccaaactatcagtgctccacacatgcatgctactgtcctcaagctcctggatgcgcagctcaagccagggcaccgagttttagatgttggatctggttctggctaccttgtagcagtgtttgccaagctcgtactgccaggagggtgcgtgcttggcttggaaaaggtgccagagctggcccagcgatccatctcaaacatccaggcagcctgcccagagctggca…
PsbP	dtdenovo16799/dtcontr8259/dt2M0h8259/dt2m30m8322/dt2M4h8285/mRNADt1746	atgctggtcaacagcagggcgctctcatgcccctcacacatgcctgcaagcagcagggtccagggccgagcttcagcctcagtcaatcccttgcgtgctcacagcaccttgccagcatcagcagttccagcagcacgccatcagcctagcgcagcgtgcgcaggatctacaacagcagcgccaagagaatgcagctgcagtgatagcagcatcgcagaggatcagagccctatgcagcagatcagagacagggtcaaaagcagtagtgctagtagcagctccagcacagcagcagcgtgcgtcagtccgaggcgtgcggtgctcctaggcgcagctgtctcagccctggctctttccagtcccctagggctccctgcagcccaggccgtgacctttgct…
PsbP	dtdenovo1245/dtcontr619	atgcgcaccagcgtgcctagcctgcagcggaacctaggcaattgcagcacaggcgtcgcctctccctgccctctgcggagcccacaggtgctgccccagcgtgccttgcacatcgtgcctgcagctaccagggcacccagcgcgtacagcctattcaccaaagagcgctacaagccggtgatggacgaattgaagaaggcgaagaaagaggctaagctcgcggacgtcacctccatcatccgcgaggagtggagcaagatgaacgacaagagcaagcagccgtacgtgtcgcaggccaacaagcggaaggaggaggtcgcctcggcgaaggctgaagagaagaaaaacgctggcccaactaagccaccaagctcctatgctcaattcaccaaggaaatg…
PsbP	dtdenovo12450/dtcontr6134/dt2M0h6155/dt2m30m6183/dt2M4h6170	atgccactgcgcggccaaacggtgcctgttggtgctcagcctcagaaggctctgggtaagagtgcccctctactacagcataggaggaaggcaagtgcgccacgccctctgacacctgtggcagccagcactcaggagggctccaacccttccactgaggccccccagcgcaggggcccagtggggtctctgattgatatgtcccagccaggcctgagcaggcgccaagtcctccaggccgctggagcagctgccacagcagttgcttgcccttgctgccccactggcccagccatggcggctgcagactgggactacgagtctgctggtttcactgctggatacactgggtggttgaggcgctggtcaggcatctgtgcagctggaggccagcaatcc…
ribosomal protein L7 L12	dtdenovo12147/dtcontr5997/dt2M0h6022/dt2m30m6044/dt2M4h6032/dsdenovo6586/mRNADt22916	atggccgctctcttgaagtccaactgcatggcgcagaagagcctggctgcccgccccgtgcggagccttgctaccgtggcgccccggccatctcgtgccctggtggccccagtgcgtgcatcttccgccgctgtgtccgaaattgtggacaagctgaagaccctgaccctgctggaggccagcgagctggtctctgagattgagaccacctttggagtggatgcctctgctgccgccgctgcccctgtggctgttgctgctgcccctggtgctggcgcagctgcccctgccgctgaggaggagaagaccaccttcgatgtggtcttggaggagatcccaggcgataagaaggtggctgtgtacaaggctgtgcgtgccattgctgacatccccgtcaac…
ribosomal protein L7 L13	dtdenovo12146	atggcgcagaagagcctggctgcccgccccgtgcggagccttgctaccgtggcgccccggccatctcgtgccctggtggccccagtgcgtgcatcttccgccgctgtgtccgaaattgtggacaagctgaagaccctgaccctgctggaggccagcgagctggtctctgagattgagaccacctttggagtggatgcctctgctgccgccgctgcccctgtggctgttgctgctgcccctggtgctggcgcagctgcccctgccgctgaggaggagaagaccaccttcgatgtggtcttggaggagatcccaggcgataagaaggtggctgtgtacaaggctgtgcgtgccattgctgacatccccgtcaaccttgtgaaggagtggacccagacactg…
ribosomal protein L7 L14	mRNADt22919	atggccgctctcttgaagtccaactgcatggcgcagaagagcctggctgcccgccccgtgcggagccttgctaccgtggcgccccggccatctcgtgccctggtggccccagtgcgtgcatcttccgccgctgtgtccgaaattgtggacaagctgaagaccctgaccctgctggaggctagcgagctggtgtcagagattgagaccaccttcggcgtggatgcttctgcggcagctgctgcacccgtggccgttgctgctgctcctggtgctggtgctgcagcccctgctgctgaggaggagaagactacctttgatgtcgtgcttgaggaaatccctggtgacaagaaggtggctgtgtacaaggcagtgcgtgccattgctgacatccccgtgaac…
ribulose 1,5-bisphosphate carboxylase/oxygenase (Rubisco)	mRNADt5864	gtaggtaacgtatttggtttcaaagcgttacgtgcatcacgtcttgaagatcttcgtatttcaccagcttatgttaaaacattcgttggaccacctcatggtattcaagttgagcgtgacaaattaaacaaatacggtcgtggtttattaggttgtacaattaaaccaaaattaggtttatcagctaaaaactacggacgtgctgtttacgaatgtttacgtggtggattagactttacgaaggatgacgaaaacgtaaactcacaaccattcatgcgttggagagaccgtttcttattcgtagctgaagctatttacaaatcacaagcagaaactggtgaaattaaaggtcactacttaaacgctacagcaggtactgctgaaggaatgcttcaacgt…
Rieske-like [2Fe-2S] domain	dtdenovo9327/dtcontr4561/dt2M0h4593/dt2m30m4601/dt2M4h4586/dsdenovo5002/mRNADt4101	atggccctccttgcatccaagccctgctccctggcaaaccccgtcccccgcaccgcatcgcgccagcgtgtgagcgtgcagtgtgccgcgtggacaaaggccacaaacaagtctgaaatccaggcgaacggcggccgcaaggtttgcgagatcggaggccagagggtgctggttgctgaggctgatggtcagatctacgctgtcagcaacaagtgctcgcacttggggctgcctctcgtaggaaagactgccctgctgcaaggcaaggtgcaggacaagtgcattgtctgtcccgcacacggtaccgcctttgacctggccagcggagaggtgaagggcaagtggtgcccctccctgcctgacggcatctcgactggatttgggctcaccccccccaag…
RNA-binding protein with multiple splicing	dsdenovo10944	atggatcccaatcccagcagcgctgcagccaccggtcaacgtgcacaaccaggcatgcagcagggtccggagctcctggttcctgtcggtggcaggagcagggatgtgggcaccgaggatgctgtgcgcacaatcttcatcaccggtttccctcaaggcgtgaaagagcgagagttgcacaacctcgtgcgatacttacctggctatgaagcatcccagaggaacacagctgggaggagtggcagctgccagcacatcaccatgcgcagctccctagcccttgcgcaccatcccctgaaaccctttccagacctcacaggtatgagcatgaggggggacctggccctcggctttgtgctgttctccagtcactggcacgcacgccaagcgcaggacgcc…
RNA-binding protein with multiple splicing	dtdenovo20263	atggatcccaatcccagcagcgctgcagccaccggtcaacgtgcacaaccaggcatgcagcagggtccggagctcctggttcctgtcggtggcaggagcagggatgtgggcaccgaggatgctgtgcgcacaatcttcatcaccggtttccctcaaggcgtgaaagagcgagagttgcacaacctcgtgcgatacttacctggctatgaagcatcccagaggaacacagctgggaggagtggcagctgccagcacatcaccatgcgcagctccctagcccttgcgcaccatcccctgaaaccctttccagacctcacaggtgtccagagcagccctacaacacagggcctgcaaggtttggggcagcgcatgatgagcatgaggggggacctggccctc…
RNA-binding protein with multiple splicing	dtdenovo20262	atggatcccaatcccagcagcgctgcagccaccggtcaacgtgcacaaccaggcatgcagcagggtccggagctcctggttcctgtcggtggcaggagcagggatgtgggcaccgaggatgctgtgcgcacaatcttcatcaccggtttccctcaaggcgtgaaagagcgagagttgcacaacctcgtgcgatacttacctggctatgaagcatcccagaggaacacagctgggaggagtggcagctgccagcacatcaccatgcgcagctccctagcccttgcgcaccatcccctgaaaccctttccagacctcacaggtgtccagagcagccctacaacacagggcctgcaaggtttggggcagcgcatgatgagcatgaggggggacctggccctc…
RNA-binding protein with multiple splicing	dt2m30m10048/dt2M4h9984	atggatcccaatcccagcagcgctgcagccaccggtcaacgtgcacaaccaggcatgcagcagggtccggagctcctggttcctgtcggtggcaggagcagggatgtgggcaccgaggatgctgtgcgcacaatcttcatcaccggtttccctcaaggcgtgaaagagcgagagttgcacaacctcgtgcgatacttacctggctatgaagcatcccagatgagcatgaggggggacctggccctcggctttgtgctgttctccagtcactggcacgcacgccaagcgcaggacgccattgcaggcaccccttttgaggtgctgctgcctgcatctcttgcccccacttcagcaacagctgcaggaccctctcagctcatacccccaacgagacccacc…
RNA-binding protein with multiple splicing	dt2M0h9948	atggatcccaatcccagcagcgctgcagccaccggtcaacgtgcacaaccaggcatgcagcagggtccggagctcctggttcctgtcggtggcaggagcagggatgtgggcaccgaggatgctgtgcgcacaatcttcatcaccggtttccctcaaggcgtgaaagagcgagagttgcacaacctcgtgcgatacttacctggctatgaagcatcccagatgagcatgaggggggacctggccctcggctttgtgctgttctccagtcactggcacgcacgccaagcgcaggacgccattgcaggcaccccttttgaggtgctgctgcctgcatctcttgcccccacttcagcaacagctgcaggaccctctcagctcatacccccaacgagacccacc…
RNA-binding protein with multiple splicing	dtdenovo20261	atggatcccaatcccagcagcgctgcagccaccggtcaacgtgcacaaccaggcatgcagcagggtccggagctcctggttcctgtcggtggcaggagcagggatgtgggcaccgaggatgctgtgcgcacaatcttcatcaccggtttccctcaaggcgtgaaagagcgagagttgcacaacctcgtgcgatacttacctggctatgaagcatcccagaggaacacagctgggaggagtggcagctgccagcacatcaccatgcgcagctccctagcccttgcgcaccatcccctgaaaccctttccagacctcacaggtgtccagagcagccctacaacacagggcctgcaaggtttggggcagcgcatgatgagcatgaggggggacctggccctc…
RNA-binding protein with multiple splicing	dtcontr9966	atggatcccaatcccagcagcgctgcagccaccggtcaacgtgcacaaccaggcatgcagcagggtccggagctcctggttcctgtcggtggcaggagcagggatgtgggcaccgaggatgctgtgcgcacaatcttcatcaccggtttccctcaaggcgtgaaagagcgagagttgcacaacctcgtgcgatacttacctggctatgaagcatcccagatgagcatgaggggggacctggccctcggctttgtgctgttctccagtcactggcacgcacgccaagcgcaggacgccattgcaggcaccccttttgaggtgctgctgcctgcatctcttgcccccacttcagcaacagctgcaggaccctctcagctcatacccccaacgagacccacc…
sedoheptulose-bisphosphatase	dtdenovo25352/dt2M0h12505/dt2M4h12566	atgatggcacagaagcagatggcccaggctgccggcctccagcgtaccagcgccccggtgcccaaggtgggccgcaccatgcccgttgtgcgtgctgctgctgctacctcctccttccagggcgctgccgtcgctcccaagctcaggcaggccgcaggacgcaggcaggctgcccgtgcatcccgcaggaccgcagtgcagacacaggccaagctgggtgacaccctgaacgagttcctcatcgacgccacccaggacatcaagctcaggacgctggtgacctccctgtccgagtgcatccgcaccatcgcttacaaggtccgcaccgcctcctgcgctggcactgcttgcgtgaactccttcggcgatgagcagctggctgtggatatggtggcagac…
serine threonine-protein kinase	dtdenovo20392/dtcontr10037/dt2M0h10021/dt2m30m10120/dt2M4h10059/dsdenovo11032	atgaacgactacgacgtgaaggagatcattgggaaaggatctttcggggatgtgttcctcgcctacaaacgaggagagcaaccaaggaaggcgtacgtgctgaaaaggatcaagcttgcgcgccagaccccatggcagagggaggccaccgcaagggagatcaatctcatgcagtccctcaggcaccccttcattgtgccctttgtggagtcatggacctacaactcccacactgtcaacgtggtgctggggtactgcgagcaaggggacctgggcactatcatgctgaagcggaagaagccgtatgatgagcagacgctacgccgctggcttgcccagatgctgctggctctggactatctggagcagaagaatgtgctgcatcgagacatcaaaaca…
Sigma 54 modulation protein / S30EA ribosomal protein	dtdenovo509/dtcontr249/dt2M0h258/dt2m30m247/dt2M4h256/dsdenovo265/mRNADt15701	atgctgctctcgcgtagtacagtcccctgcgcgtcctctcgccctgctgctccctctgcccctgtgctggcgaacgccagtgtgccagtgtgctctcgccgcgccgtgcaaagccaaggcctgcaccgatgtgccactagccctgttccctgcagtgccatccctgcatttgccccaagaccccagaaccgcaacgtggacgtgtcagtggctagcacagcaagcaagggagcccctggcacagtgaaaatagtcatccaaggcaggaaattggaggtgacagatgctattcgagagtacgttcaggagaagatcactcgcgcactggcccatgtagctcaggtcatcaaggaagtagatgtgaccttaagtgtgcgcggcggagataccggcacccac…
small molecular heat shock protein 10	dtdenovo5223/dtcontr2560/dt2M0h2576/dt2m30m2576/dt2M4h2596/dsdenovo2784/mRNADt21287	atggcccaacgcctcaagcctctcctggacaaggttcttgtgcagaaggtcatgcccatgaccaagtctgctgcggggatcctgatgcctgagactgcggcaccacgggtaaatgaggggattgtgctggccactggcccaggcaggcgcacgcttgatggctccctggtgcctgtgagcgttaaggaaggggacaaagtgctcctcccggagtttggcggcatcaccgtgaagctagacgaggacaagaccaaagagacttcttatcacctgtaccgtgacgatgagatcctgggtattttgcaagacaagtaa
small molecular heat shock protein 11	mRNADt21288	accaccatggcccaacgcctcaagcctctcctggacaaggttcttgtgcagaaggtcatgcccatgaccaagtctgctgcggggatcctgatgcctgagactgcggcaccacgggtaaatgaggggattgtgctggccactggcccaggcaggcgcacgcttgatggctccctggtgcctgtgagcgttaaggaaggggacaaagtgctcctcccggagtttggcggcatcaccgtgaagctagacgaggacaagaccaaagagacttcttatcacctgtaccgtgacgatgagatcctgggtattttgcaagacaagtaa
Snf1-related protein kinase 1 (SnRK1)	dtdenovo17665/dtcontr8718/dt2M0h8711/dt2m30m8786/dt2M4h8738/dsdenovo9543/mRNADt30647/mRNADt30648	atgtcgtcgtctgctactccatcgcggcctgcgccccttgacaatcacccaaaatacgagaaggtcaaggacttgaacagcggcacgtttggcttcgtgcagctatgcaaggacaagaccaccaacgagctggtggcgatcaaattcatcgagaggggagacaaggtcaccaagtatgtagagcgtgagatcgtgaaccaccgaacgctcatgcacccgcacatcgtgcagttcaaggaggtgttcctcacacccgtgtacctcgccatcgccatggaatttgcacccgggggggacatgtttgagtacgtggtgaaaaagaacggactgcgggaggatgaggcccgatggttcttccaacagctcatagtggccctggactactgccacaagatgggt…
sodium hydrogen exchanger	dtdenovo18865	atgacgcccataggtgctgcccaccgccatgctagctgcttgcaacacaattggaccttaccaactgtgtcagatgtcgccatgtctggcagggtgctgcccaaggaagacagcagcagacatccacaggcgctgcctgccggcacagacgcaatcccagaggcacaagctgaggacgacctgcagctctctgagtgggccccctccagcacccccacagggttcactccgccctccctcagcttcacgcagcccgacaccgcccccgacgctgctgccttgccagctgagagttatgatagggagccgtcagagcctgcagagcctgcgggtgccagccgcgcgcgcagcaggtacaccacaggtgccgatgtgttgctgcaacagccgctgctgtcc…
Sugar (and other) transporter	dsdenovo4048	atgatgctgaagggaaagaccgctgccaagggctccacgatgggcggatgcgccaagctgaccccaactctgcctgtgcgcggggctggcttgaagcgtaggcagactgttgtcgtagagagctcgcgcaaggagctgttggacagcagattgtacaggcgcacggtggctgaccatgaatactgggagaactacctcaccacagaccgctacttcaagaacatgctgagcttgcccagctcacgcatcatccgcgctctgtcgggccccctggccagcgttgccttgacttccgccctcgtgtgcacctacgagaccctgcgcagtcaaggcgtcgtccctgctgagttccccagcatcctcatgccaaacaacacacctctgcagctcaccagcttc…
Sugar (and other) transporter	dsdenovo4048	atgatgctgaagggaaagaccgctgccaagggctccacgatgggcggatgcgccaagctgaccccaactctgcctgtgcgcggggctggcttgaagcgtaggcagactgttgtcgtagagagctcgcgcaaggagctgttggacagcagattgtacaggcgcacggtggctgaccatgaatactgggagaactacctcaccacagaccgctacttcaagaacatgctgagcttgcccagctcacgcatcatccgcgctctgtcgggccccctggccagcgttgccttgacttccgccctcgtgtgcacctacgagaccctgcgcagtcaaggcgtcgtccctgctgagttccccagcatcctcatgccaaacaacacacctctgcagctcaccagcttc…
Sulfhydryl oxidase ALR/ERV	dtcontr12392/dt2M0h12396/dt2m30m12494/dt2M4h12462/mRNADt34213	atggtacaaacggccacaacatctacacagaataagagtcaggattctgcccaaggaagccagcagcaaccccacaccgaggcacccgggcaggcccacacaggcaccagcactagccatgcccctccggtgcccttccctaaagactgcaaggcatgcaagggcgcacagcacatgctggataccttcaagcacatgagcctgcggaacaagcaggagcagttaaacggcagcgccaaagcaaacgcagcttcgcagcatcccccccgcacagccctgcaccaacagcaaccccagcaaggtggtggggagcaagccgcatcctccccatatggcgtttatgggctgcaatgtcccccggatactgcagagctgggccgcgcctcttgggttttcctg…
Surfeit locus protein 6	dsdenovo6581	atgacgggattagtcgacacagacgccatgctcgcgcactccaggttctttgaccatcttgtggacctgatacctgccaagtattaccgagcagacgagcacgagcatgtagagctgcggttcttgccgcagcaagccaaagcagccgcgaagcaggacttcaagaagcaggccaaggccaacaagcgtagaaagctggaccccaatggaggggagcacaacagcagtgaggatgaagaggcacagcctgggcctggcagcgctcacgcagcagcaactgcaaacctggggggcagcaactgctcaagggaggagctgcaggccaggttgcacaagaagatagaggacgtgcagcagctgcgagggcacaaggacaagaagcaggtcgccaaggaagct…
Surfeit locus protein 7	dtdenovo12138/dtcontr5991/dt2M0h6016/dt2m30m6038/dt2M4h6026/mRNADt30531	atgacgggattagtcgacacagacgccatgctcgcgcactccaggttctttgaccatcttgtggacctgatacctgccaagtattaccgagcagacgagcacgagcatgtagagctgcggttcttgccgcagcaagccaaagcagccgcgaagcaggacttcaagaagcaggccaaggccaacaagcgtagaaagctggaccccaatggaggggagcacaacagcagtgaggatgaagaggcacagcctgggcctggcagcgctcacgcagcagcaactgcaaacctggggggcagcaactgctcaagggaggagctgcaggccaggttgcacaagaagatagaggacgtgcagcagctgcgagggcacaaggacaagaagcaggtcgccaaggaagct…
Thiamin pyrophosphokinase, vitamin B1 binding domain	mRNADt1103	gcagaattcttggctaggagggaaacagggagcatttcagagggacgacaggagcatcatcaccaggagcaggagcagcagcagcagcacgcgctgggagggctatcccacagcattccaaaaacacacacataccttgtccttctgaattggaacctatccaagcgcctgcctgatttttgggaaaaagcgggaacttgcatttgtgctgacggcgggtctaatcgcctgcatgatgagcttcctgccatgatgcctgaacaggaccctgaggctgtgagacgcaggttcctgccgagcgtgatcaagggcgatctggacagtattcggccagaggtgcttgccttctacaaaggcctgggcgtgcccatcgtagacagctctgcagatcaagacacc…
Thiamin pyrophosphokinase, vitamin B1 binding domain	dt2M0h1920	atgagcctccaccacccgggtggagctccgcggctgctcacgtcagaattcttggctaggagggaaacagggagcatttcagagggacgacaggagcatcatcaccaggagcaggagcagcagcagcagcacgcgctgggagggctatcccacagcattccaaaaacacacacataccttgtccttctgaattggaacctatccaagcgcctgcctgatttttgggaaaaagcgggaacttgcatttgtgctgacggcgggtctaatcgcctgcatgatgagcttcctgccatgatgcctgaacaggaccctgaggctgtgagacgcaggttcctgccgagcgtgatcaagggcgatctggacagtattcggccagaggtgcttgccttctacaaaggc…
Thiamin pyrophosphokinase, vitamin B1 binding domain	dsdenovo2080	atgagcctccaccacccgggtggagctccgcggctgctcacgtcagaattcttggctaggagggaaacagggagcatttcagagggacgacaggagcatcatcaccaggagcaggagcagcagcagcagcacgcgctgggagggctatcccacagcattccaaaaacacacacataccttgtccttctgaattggaacctatccaagcgcctgcctgatttttgggaaaaagcgggaacttgcatttgtgctgacggcgggtctaatcgcctgcatgatgagcttcctgccatgatgcctgaacaggaccctgaggctgtgagacgcaggttcctgccgagcgtgatcaagggcgatctggacagtattcggccagaggtgcttgccttctacaaaggc…
Thiamin pyrophosphokinase, vitamin B1 binding domain	mRNADt1102	gcagaattcttggctaggagggaaacagggagcatttcagagggacgacaggagcatcatcaccaggagcaggagcagcagcagcagcacgcgctgggagggctatcccacagcattccaaaaacacacacataccttgtccttctgaattggaacctatccaagcgcctgcctgatttttgggaaaaagcgggaacttgcatttgtgctgacggcgggtctaatcgcctgcatgatgagcttcctgccatgatgcctgaacaggaccctgaggctgtgagacgcaggttcctgccgagcgtgatcaagggcgatctggacagtattcggccagaggtgcttgccttctacaaaggcctgggcgtgcccatcgtagacagctctgcagatcaagacacc…
Thiamin pyrophosphokinase, vitamin B1 binding domain	dtdenovo3923	atgtctgcattccttcgtttcaagtccctctgcaattcaggctctaaacgggcatcttctacctacagctcggctgtggtagctggaccccagcacgcatcccctgcccccaagcccagctcatccgctgctcacacacacttacaagctgtgaaggaggagcttgcatcaagcggccagggaagcagcctcgggaggtcgcaaagccacttgcaaccaacacctagtatcgcccctttgaccatgagcctccaccacccgggtggagctccgcggctgctcacgtcagaattcttggctaggagggaaacagggagcatttcagagggacgacaggagcatcatcaccaggagcaggagcagcagcagcagcacgcgctgggagggctatcccacagc…
Thiamin pyrophosphokinase, vitamin B1 binding domain	dtdenovo3922/dtcontr1910/dt2m30m1915/dt2M4h1943	atgagcctccaccacccgggtggagctccgcggctgctcacgtcagaattcttggctaggagggaaacagggagcatttcagagggacgacaggagcatcatcaccaggagcaggagcagcagcagcagcacgcgctgggagggctatcccacagcattccaaaaacacacacataccttgtccttctgaattggaacctatccaagcgcctgcctgatttttgggaaaaagcgggaacttgcatttgtgctgacggcgggtctaatcgcctgcatgatgagcttcctgccatgatgcctgaacaggaccctgaggctgtgagacgcaggttcctgccgagcgtgatcaagggcgatctggacagtattcggccagaggtgcttgccttctacaaaggc…
Thioredoxin-like domain	dtdenovo23825/dtcontr11718/dt2M0h11732/dt2m30m11820/dt2M4h11749/dsdenovo12970/mRNADt21603	atggcatcgctggcgaggagtgccaccaacatgcagtgccctgtcggcactggagcgaggcaatgcgtggctcctcgaatgactcgtcctgccaggcggttgcacgcaatcacccgagttgccaatgtggatgaatccaactttgagcaagaagtcctgaaggcagacaaggcggtccttgtggatttctgggatacttggtgtggaccatgcaagctgatggacccattgatggcctgggctgagcaggagtacgccagcacgcttaaagtggtcaagattaggcatgattcctgcccaaagttaatacagcagtacaaggtttacgggctacctgcgttcttaattttcaagaacggcgaactagtgcctgggtgtaagagggagggtgctgtcaac…
Thioredoxin-like domain	mRNADt21604	caatgcgtggctcctcgaatgactcgtcctgccaggcggttgcacgcaatcacccgagttgccaatgtggatgaatccaactttgagcaagaagtcctgaaggcagacaaggcggtccttgtggatttctgggatacttggtgtggaccatgcaagctgatggacccattgatggcctgggctgagcaggagtacgccagcacgcttaaagtggtcaagattaggcatgattcctgcccaaagttaatacagcagtacaaggtttacgggctacctgcgttcttaattttcaagaacggcgaactagtgcctgggtgtaagagggagggtgctgtcaaccagaagatgctggcagattacatcaagcagtttgggggtgaccagtag
Translocation protein Sec62	dtdenovo13036/dtcontr6445/dt2M0h6464/dt2m30m6507/dt2M4h6478/dsdenovo7103/mRNADt24894	atgatgctctccgggaagctcgcccagtgccctagccggccagcagcaggtggtgctgccaggaggacaagcacagtggctggtgcttcccggcgcgtggttgctgctcctcagcaacgcgtgtcccgggcgaccctgaagaccaggtctgcagaggagggagcccaggagggcgccggggagcagcccgctgcccctgtcatggaggaggcgacgatcctgcgctctgacgagcgagggccacgccggtccggtccccagcaagacaaccctgagttcacccacttcttgcctttgcccaagccagcacacctcatctacatcaagcccactgtggctgtcgtggctgatgtagctgcccggaactcagtaggcctgaagatgtcagccggtgatgat…
voltage-dependent anion channel protein 2	mRNADt24992	atgcccacgcggggtggcttggagaagggctgcagaccgttcaccacagcagaggcgctcacctgcgcacgcatgtacgtggacagactggtggtgggtaaggtgttcacaggaactcgtctgtgccagggtgaaaaggtggaaattggtggaaaggatacacaagtgtgggaaaaggcatgtgcatgcctcctaatgcagagctgcctgcgcgcaaatcatcgctcctgctccagcagaaaaaagggatccagccaaatgacgggcgctgatggtacctggggaagaaatgcttggcttggctgtaggcattga
voltage-dependent anion channel protein 3	dtdenovo23342	atgagcagcagcgtgacacagggcctgtttggcagcagcttcacggcagctgctgcagcgccccccgcaggggctgagaagcagaagaagacggtggcagcgccttacggcagcatcggtgcttgggcagaggaagtgctgtacggcaagaggggcgttggtgcgtacgccgttgaccacactggtacattgaagagcaagacagcctctggcctcagcatcaccggcacaaccaccaagagtggtgcaactggcgctgtgagcacgagcctgaaggcagccacccctgtggcgctgccgctgctgatcaagaagcagccagacggcaagcgcagcatctcgctggatgcgcgcccaaaggctgaaaaggaggtggagggcaccgtgccctccctcaac…
voltage-dependent anion channel protein 4	dtcontr11487/dt2M0h11491/dt2m30m11582/dt2M4h11513/mRNADt24991	atgttcagcaacatgagcagcagcgtgacacagggcctgtttggcagcagcttcacggcagctgctgcagcgccccccgcaggggctgagaagcagaagaagacggtggcagcgccttacggcagcatcggtgcttgggcagaggaagtgctgtacggcaagaggggcgttggtgcgtacgccgttgaccacactggtacattgaagagcaagacagcctctggcctcagcatcaccggcacaaccaccaagagtggtgcaactggcgctgtgagcacgagcctgaaggcagccacccctgtggcgctgccgctgctgatcaagaagcagccagacggcaagcgcagcatctcgctggatgcgcgcccaaaggctgaaaaggaggtggagggcaccgtg…
Zinc chaperone CobW-like	dsdenovo9842	atggaagaggcaataccggagccggtgccgcttgaggacgcagaagtgaggagcgaggaaggcgaggaggggcctgttccagtcacgctcatcactggttttctgggctcaggcaaaaccactctggtccgccacttgctgacagcagaccatggtttacgcatcgctgtaattttgaacgagtttggtgagagcgtagagggcgcttactggcaagacctggaggccatgaaggccatgagcggggagtgggtggagctggacaatggctgcctgtgctgctccgtgaagaatgatttcgtgcaagccttggagtcgctgatgcggaagaagcaaaagccgcaggccatcgtcattgaaaccacaggcctggcaaaccctggccctgtggctgcagca…
Zinc chaperone CobW-like	dtdenovo18225/dtcontr9002/dt2M0h8989/dt2m30m9065/dt2M4h9024/mRNADt24193	atggaagaggcaataccggagccggtgccgcttggtagccaagaggacgcagaagtgaggagcgaggaaggcgaggaggggcctgttccagtcacgctcatcactggttttctgggctcaggcaaaaccactctggtccgccacttgctgacagcagaccatggtttacgcatcgctgtaattttgaacgagtttggtgagagcgtagagggcgcttactggcaagacctggaggccatgaaggccatgagcggggagtgggtggagctggacaatggctgcctgtgctgctccgtgaagaatgatttcgtgcaagccttggagtcgctgatgcggaagaagcaaaagccgcaggccatcgtcattgaaaccacaggcctggcaaaccctggccctgtg…
ZIP Zinc transporter	dsdenovo10364	atgatgcggaaggacaaggcgtggattgcaggaactgatgctgggtaccgcagcagatggtgcagaacgtccgaaccacgcttctggttcgacgccttcagtgcattgttgctgcttgctgtggctgtgctgggggcttggctgccgcggtacctggcccagagaggcaccagtagccccttgcctggctacagtaccaacactagcagcaagctgtaccacttgggcaactgcttgtcaggcggggtcatgctgtctgctggcttttgccaccttttggccgatgcgcttccctccctgggctttgtggggcgtttcccattggccaccttcctggcagctctggggatgctcctgactctctcagctgaccaggtggtgcaagcggtcacagagtcc…
